# Supplementary material for: Mutant KRAS associated malic enzyme 1 expression is a predictive marker for radiation therapy response in non-small cell lung cancer
Source: PubMed Central journal article supplement (PMC4502640; doi:10.1186/s13014-015-0457-x), 2015-07-16

**Figure S1**

**A**

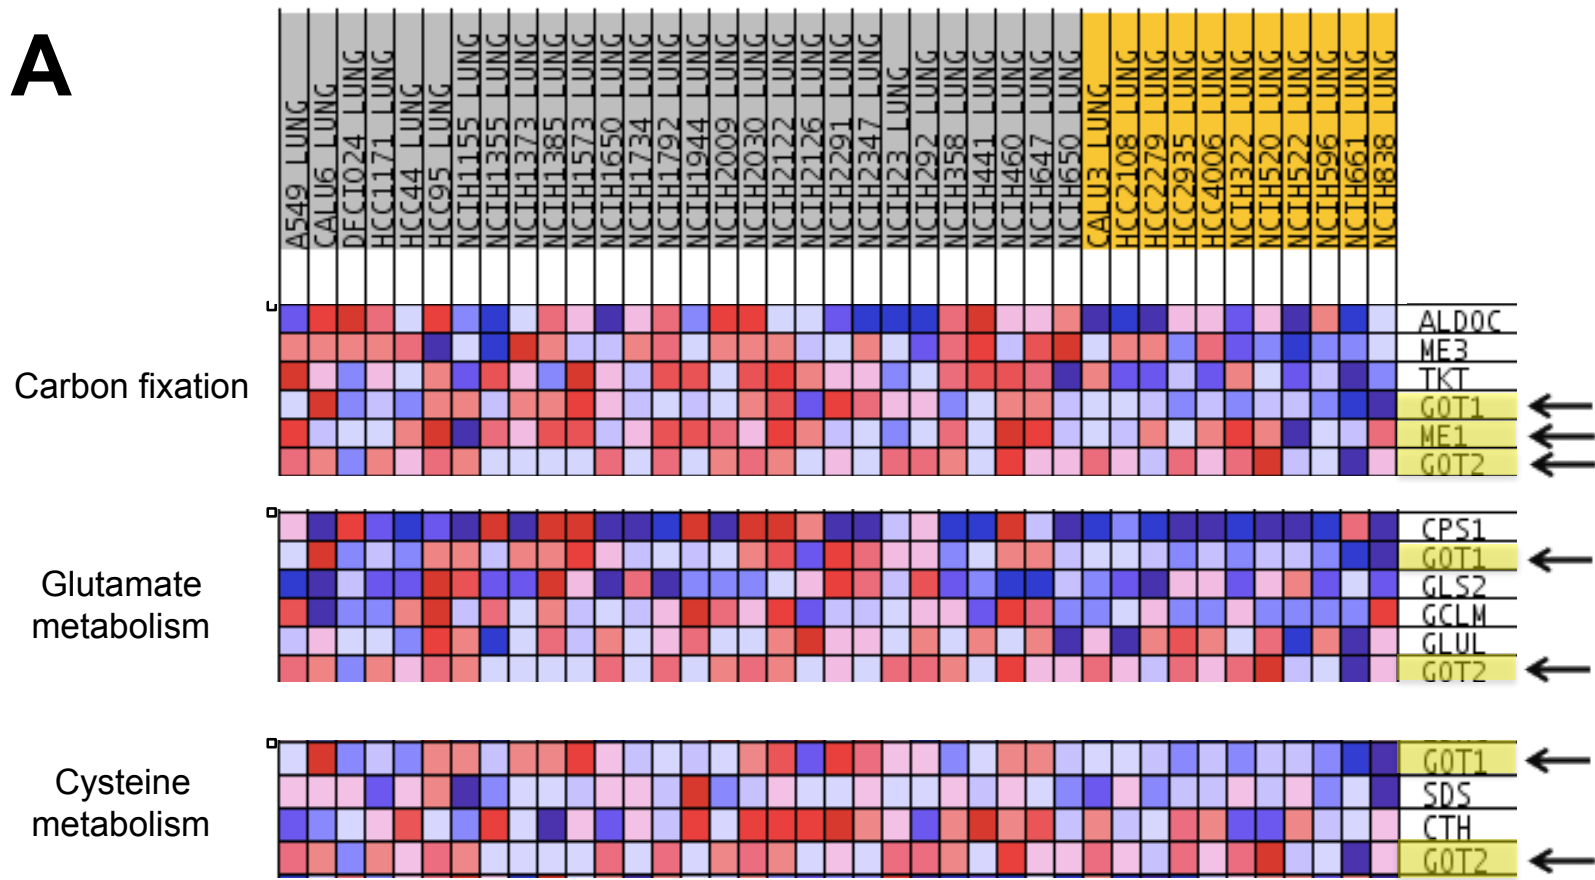

**B**

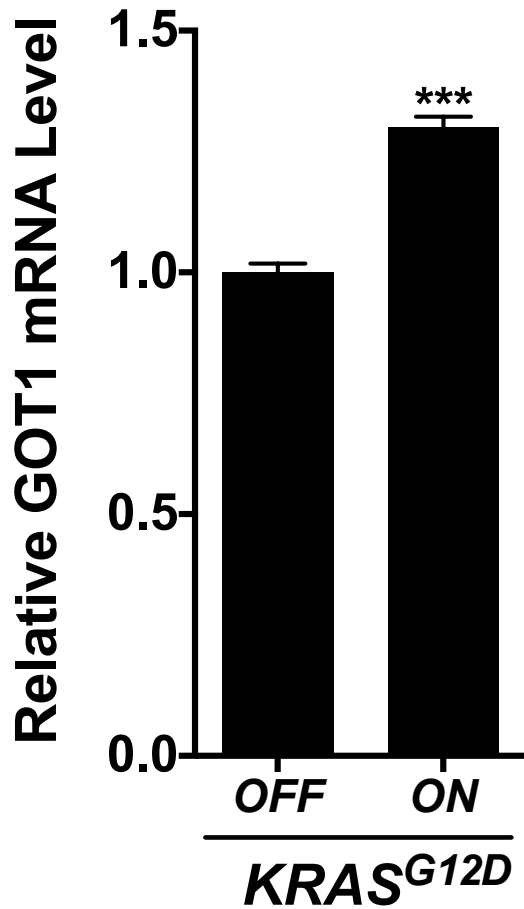

**C**

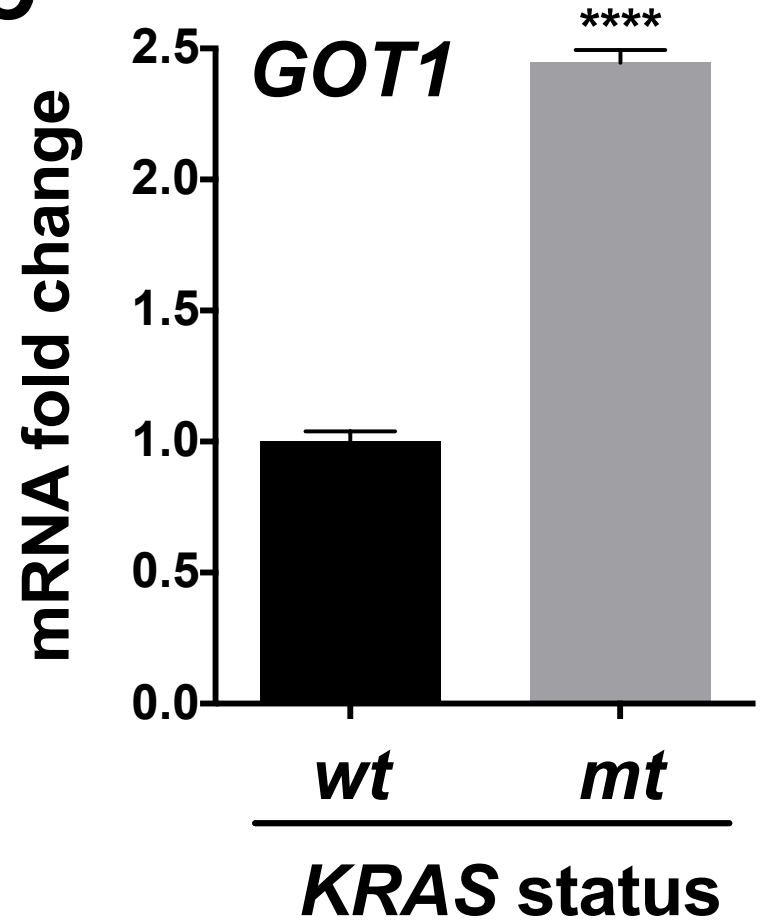

Supplement: 13014_2015_457_MOESM1_ESM.pdf [file 13014_2015_457_MOESM1_ESM.pdf]
