# Supplementary material for: Mutant KRAS associated malic enzyme 1 expression is a predictive marker for radiation therapy response in non-small cell lung cancer
Source: PubMed Central journal article supplement (PMC4502640; doi:10.1186/s13014-015-0457-x), 2015-07-16
Supplement: 13014_2015_457_MOESM2_ESM.pdf [file 13014_2015_457_MOESM2_ESM.pdf]

# Table S1

## TCGA lung adenocarcinoma patient description

| Patient_Barcode | Complete Response to radiation? | KRAS | Radiation Therapy Type  | radiation_therapy_site |
|-----------------|---------------------------------|------|-------------------------|------------------------|
| TCGA-50-5933    | No                              | G12C | EXTERNAL BEAM           | Distant Recurrence     |
| TCGA-44-6777    | No                              | G12C | EXTERNAL BEAM           | Primary Tumor Field    |
| TCGA-44-2668    | No                              | G12C | CYBERKNIFE              | Distant site           |
| TCGA-73-4659    | No                              | G12V | GAMMA KNIFE             | Primary Tumor Field    |
| TCGA-64-5774    | No                              | G12C | EXTERNAL BEAM           | Primary Tumor Field    |
| TCGA-69-7974    | Yes                             | G12C | EXTERNAL BEAM           | Distant site           |
| TCGA-95-A4VK    | No                              | G12V | EXTERNAL BEAM           | Distant site           |
| TCGA-73-4659    | No                              | G12V | Gamma Knife             | Distant Recurrence     |
| TCGA-86-7955    | Yes                             | WT   | EXTERNAL BEAM           | Distant Recurrence     |
| TCGA-86-8279    | Yes                             | WT   | EXTERNAL BEAM           | Primary Tumor Field    |
| TCGA-62-8402    | Yes                             | WT   | EXTERNAL BEAM           | Primary Tumor Field    |
| TCGA-78-8660    | Yes                             | WT   | EXTERNAL BEAM           | Primary Tumor Field    |
| TCGA-62-A46Y    | Yes                             | WT   | EXTERNAL BEAM           | Distant site           |
| TCGA-05-4382    | Yes                             | WT   | EXTERNAL BEAM           | Distant site           |
| TCGA-05-5428    | Yes                             | WT   | EXTERNAL BEAM           | Distant site           |
| TCGA-05-5425    | Yes                             | WT   | EXTERNAL BEAM           | Primary Tumor Field    |
| TCGA-55-6968    | Yes                             | WT   | EXTERNAL BEAM           | Primary Tumor Field    |
| TCGA-MP-A4T9    | Yes                             | WT   | EXTERNAL BEAM           | Primary Tumor Field    |
| TCGA-64-5779    | Yes                             | WT   | EXTERNAL BEAM           | Primary Tumor Field    |
| TCGA-91-6847    | Yes                             | WT   | EXTERNAL BEAM           | Regional site          |
| TCGA-05-4424    | Yes                             | WT   | EXTERNAL BEAM           | Distant Recurrence     |
| TCGA-50-5935    | No                              | WT   | IMPLANTS                | Distant Recurrence     |
| TCGA-50-5942    | No                              | WT   | IMPLANTS                | Distant site           |
| TCGA-73-4676    | No                              | WT   | EXTERNAL BEAM           | Primary Tumor Field    |
| TCGA-05-4424    | No                              | WT   | EXTERNAL BEAM           | Primary Tumor Field    |
| TCGA-44-6774    | No                              | WT   | EXTERNAL BEAM           | Distant site           |
| TCGA-50-5072    | No                              | WT   | EXTERNAL BEAM           | Distant site           |
| TCGA-55-6968    | No                              | WT   | EXTERNAL BEAM           | Distant Recurrence     |
| TCGA-91-6830    | No                              | WT   | EXTERNAL BEAM           | Distant site           |
| TCGA-91-6847    | No                              | WT   | EXTERNAL BEAM           | Regional site          |
| TCGA-38-7271    | No                              | WT   | EXTERNAL BEAM           | Regional site          |
| TCGA-55-7574    | No                              | WT   | EXTERNAL BEAM           | Regional site          |
| TCGA-78-7145    | No                              | WT   | EXTERNAL BEAM           | Regional site          |
| TCGA-78-7150    | No                              | WT   | EXTERNAL BEAM           | Primary Tumor Field    |
| TCGA-78-7152    | No                              | WT   | EXTERNAL BEAM           | Primary Tumor Field    |
| TCGA-78-7155    | No                              | WT   | EXTERNAL BEAM           | Regional site          |
| TCGA-78-7220    | No                              | WT   | EXTERNAL BEAM           | Primary Tumor Field    |
| TCGA-44-7669    | No                              | WT   | Cyberknife              | Regional site          |
| TCGA-53-7624    | No                              | WT   | EXTERNAL BEAM           | Primary Tumor Field    |
| TCGA-78-7162    | No                              | WT   | EXTERNAL BEAM           | Regional site          |
| TCGA-78-7166    | No                              | WT   | EXTERNAL BEAM           | Local Recurrence       |
| TCGA-78-7536    | No                              | WT   | EXTERNAL BEAM           | Primary Tumor Field    |
| TCGA-69-7974    | No                              | WT   | EXTERNAL BEAM           | Primary Tumor Field    |
| TCGA-44-2662    | No                              | WT   | EXTERNAL BEAM           | Primary Tumor Field    |
| TCGA-64-1680    | No                              | WT   | EXTERNAL BEAM           | Primary Tumor Field    |
| TCGA-44-3918    | No                              | WT   | EXTERNAL BEAM           | NA                     |
| TCGA-44-4112    | No                              | WT   | EXTERNAL BEAM           | Local Recurrence       |
| TCGA-38-4630    | No                              | WT   | EXTERNAL BEAM           | Distant Recurrence     |
| TCGA-49-4507    | No                              | WT   | EXTERNAL BEAM           | Primary Tumor Field    |
| TCGA-73-4666    | No                              | WT   | Gamma Knife             | Primary Tumor Field    |
| TCGA-73-4668    | No                              | WT   | Gamma Knife             | Primary Tumor Field    |
| TCGA-05-5425    | No                              | WT   | EXTERNAL BEAM           | Primary Tumor Field    |
| TCGA-44-5643    | No                              | WT   | IMRT                    | Primary Tumor Field    |
| TCGA-50-5045    | No                              | WT   | Radioactive vicryl Mesh | Distant site           |
| TCGA-50-5049    | No                              | WT   | IMPLANTS                | Regional site          |
