# Supplementary material for: Mutant KRAS associated malic enzyme 1 expression is a predictive marker for radiation therapy response in non-small cell lung cancer
Source: PubMed Central journal article supplement (PMC4502640; doi:10.1186/s13014-015-0457-x), 2015-07-16
Supplement: 13014_2015_457_MOESM3_ESM.pdf [file 13014_2015_457_MOESM3_ESM.pdf]

# Table S2

## ***GOT1* and *ME1* expression in TCGA lung adenocarcinoma patient tumors with treatment response after IR**

| <b>Patient ID</b> | <b>Gender</b> | <b>age</b> | <b>Treatment Response</b> | <b>Status</b> | <b><i>GOT1</i></b> | <b><i>ME1</i></b> |
|-------------------|---------------|------------|---------------------------|---------------|--------------------|-------------------|
| TCGA-05-4384      | M             | 66         | PD                        | NA            | 11.66795491        | 10.89147615       |
| TCGA-86-7955      | M             | 62         | CR                        | TUMOR FREE    | 9.957315527        | 8.465306002       |
| TCGA-86-8279      | M             | 46         | CR                        | TUMOR FREE    | 9.492075695        | 8.218630556       |
| TCGA-05-4382      | M             | 68         | CR                        | TUMOR FREE    | 8.924308363        | 9.263447149       |
| TCGA-05-5425      | M             | 68         | PD                        | TUMOR FREE    | 10.18193925        | 9.120056136       |
| TCGA-05-5428      | M             | 57         | CR                        | TUMOR FREE    | 9.849773039        | 10.96241295       |
| TCGA-05-4424      | M             | 70         | PR                        | WITH TUMOR    | 10.34071783        | 10.65979784       |
| TCGA-55-6968      | M             | 61         | PD                        | WITH TUMOR    | 10.56730367        | 9.84414929        |
| TCGA-53-7624      | F             | 40         | PD                        | WITH TUMOR    | 10.50298462        | 10.50211117       |
| TCGA-62-8402      | F             | 73         | CR                        | WITH TUMOR    | 10.60442035        | 7.776456063       |
| TCGA-78-8660      | M             | 69         | PD                        | WITH TUMOR    | 10.16245062        | 10.29830342       |
| TCGA-MP-A4T9      | F             | 54         | CR                        | WITH TUMOR    | 9.702757439        | 8.101167851       |
